# Supplementary material for: Time‐of‐flight secondary ion mass spectrometry imaging of biological samples with delayed extraction for high mass and high spatial resolutions
Source: PubMed Central journal article supplement — Rapid Commun Mass Spectrom. 2015 May 26;29(13):1187–95. doi: 10.1002/rcm.7210 (PMC5033000; doi:10.1002/rcm.7210), 2015-05-26
Supplement: RCM-29-1187-s001.pdf [file RCM-29-1187-s001.pdf]

## Supplementary Information for

# TOF-SIMS imaging of biological samples with delayed extraction for high mass and high spatial resolutions

Quentin P. Vanbellingen,<sup>†,‡</sup> Nicolas Elie,<sup>†,‡</sup> Michael J. Eller,<sup>§</sup> Serge Della-Negra,<sup>§</sup> David Touboul,<sup>†</sup> and Alain Brunelle<sup>\*,†</sup>

<sup>†</sup> Institut de Chimie des Substances Naturelles, CNRS-ICSN UPR2301, Université Paris-Sud, Avenue de la Terrasse, 91198 Gif-sur-Yvette, France

<sup>§</sup> Institut de Physique Nucléaire, UMR8608, IN2P3-CNRS, Université Paris-Sud, 91406 Orsay, France

### TABLE OF CONTENTS

|                                                                                                                                                                                                                                                                                                                                                          |   |
|----------------------------------------------------------------------------------------------------------------------------------------------------------------------------------------------------------------------------------------------------------------------------------------------------------------------------------------------------------|---|
| Figure S-1: Peak width FWHM (ns) as a function of the extraction delay (a) negative ion mode, $m/z$ 255.2 ([C16:0-H] <sup>-</sup> , blue) and $m/z$ 385.4 (cholesterol [M-H] <sup>-</sup> , green) (b) positive ion mode, $m/z$ 369.4 (cholesterol [M-H <sub>2</sub> O+H] <sup>+</sup> , blue) and $m/z$ 430.4 (Vitamin E [M] <sup>+</sup> , green)..... | 2 |
| Figure S-2: Primary ion beam profiles (b,d,f) measured on a grid (a,c,e, pitch 25 $\mu$ m, hole width 19 $\mu$ m, wire width 6 $\mu$ m), for HCBU; BA; and BA+DE setting modes.....                                                                                                                                                                      | 2 |
| Figure S-3: Part of TOF-SIMS negative ion mass spectra showing H <sup>-</sup> ion for different extraction delays. Vertical red line is to guide the eye and show the extraction delay for which the ions start shifting. ....                                                                                                                           | 3 |
| Figure S-4: Calculated arrival positions of secondary ions ( $m/z$ 400) on the surface of the MCP obtained by simulation for different kinetic energies: 0.1 eV (red); 0.2 eV (blue); 0.5 eV (orange) and 1.0 eV (green) with an extraction delay equal to the pulse duration (100 ns).....                                                              | 3 |
| Figure S-5: Calculated dispersion of secondary ion arrival positions (energy 0.1 eV) on the surface of the MCP obtained by simulation for different mass-to-charge ratios: $m/z$ 1; 6; 12; 14; 23; 48 and 100 with an extraction delay equal to the pulse duration (100 ns). ....                                                                        | 4 |
| Figure S-6: Parts of TOF-SIMS negative ion mass spectra recorded on the surface of a rat brain section, using HCBU, BA, and BA+DE setting modes and showing three deprotonated fatty acids: C16:0; C18:1 and C18:0.....                                                                                                                                  | 4 |
| Figure S-7: Parts of TOF-SIMS positive ion mass spectra recorded on the surface of a rat brain section, using HCBU, BA, and BA+DE setting modes and showing two ion species of cholesterol (a,c,e) and the vitamin E isotopic distribution (b,d,f). ....                                                                                                 | 5 |

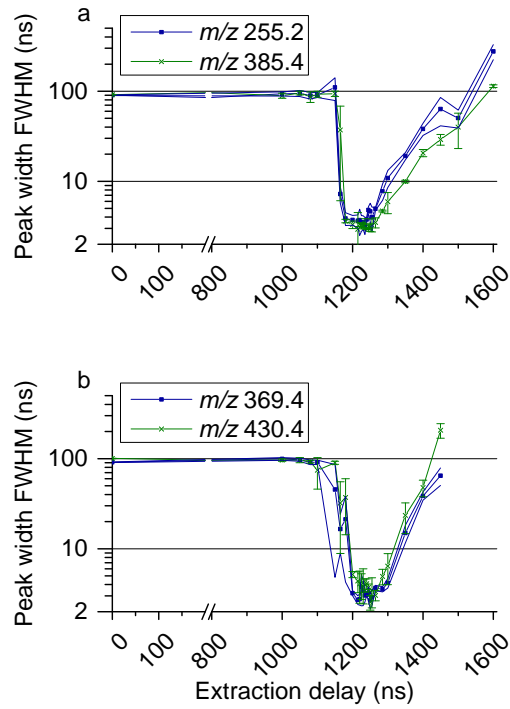

Figure S-1: Peak width FWHM (ns) as a function of the extraction delay (a) negative ion mode,  $m/z$  255.2 ( $[C_{16:0-H}]^-$ , blue) and  $m/z$  385.4 (cholesterol  $[M-H]^-$ , green) (b) positive ion mode,  $m/z$  369.4 (cholesterol  $[M-H_2O+H]^+$ , blue) and  $m/z$  430.4 (Vitamin E  $[M]^+$ , green).

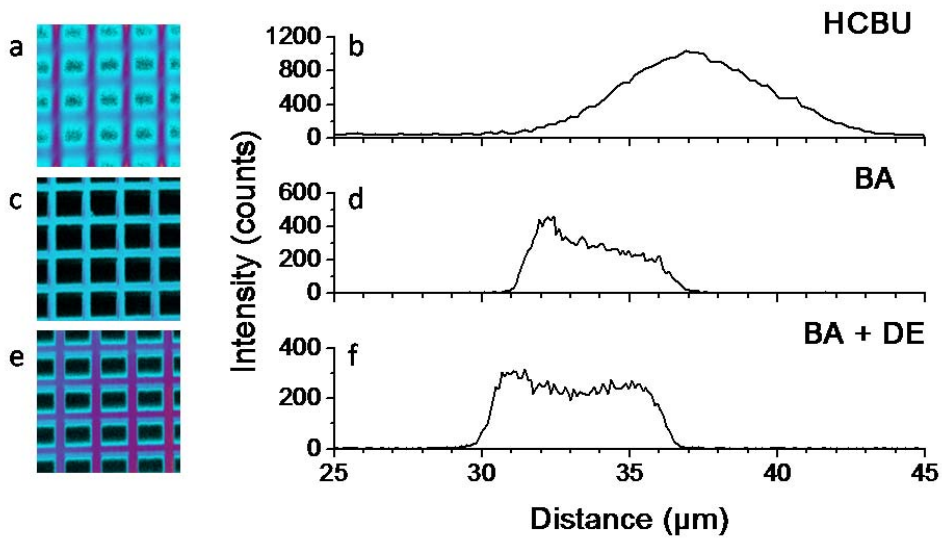

Figure S-2: Primary ion beam profiles (b,d,f) measured on a grid (a,c,e, pitch 25  $\mu m$ , hole width 19  $\mu m$ , wire width 6  $\mu m$ ), for HCBU; BA; and BA+DE setting modes.

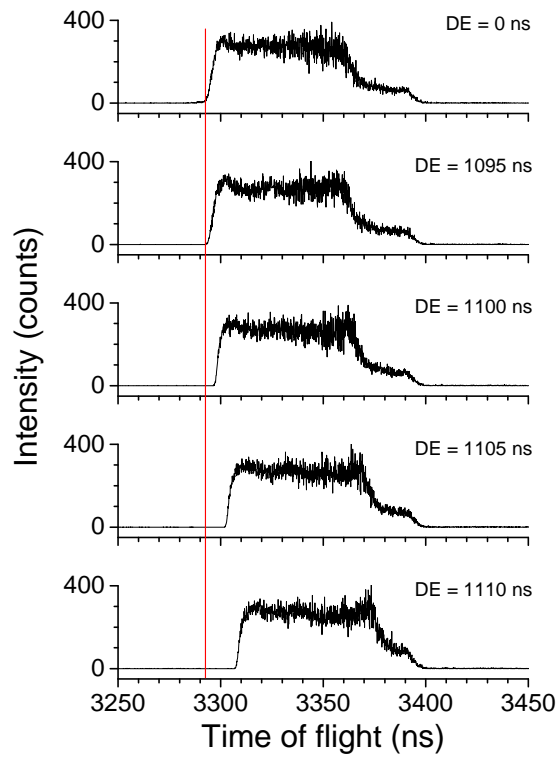

Figure S-3: Part of TOF-SIMS negative ion mass spectra showing H<sup>-</sup> ion for different extraction delays. Vertical red line is to guide the eye and show the extraction delay for which the ions start shifting.

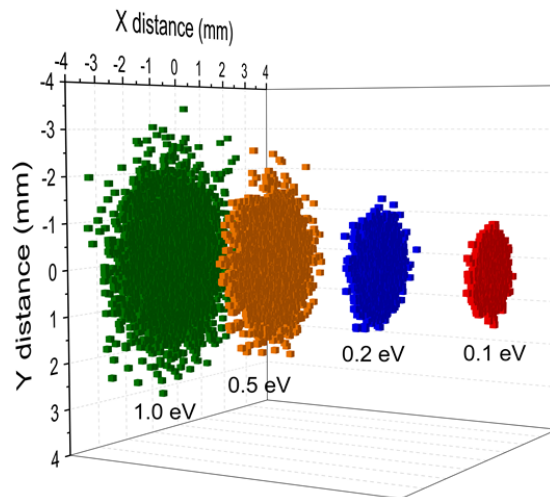

Figure S-4: Calculated arrival positions of secondary ions ( $m/z$  400) on the surface of the MCP obtained by simulation for different kinetic energies: 0.1 eV (red); 0.2 eV (blue); 0.5 eV (orange) and 1.0 eV (green) with an extraction delay equal to the pulse duration (100 ns).

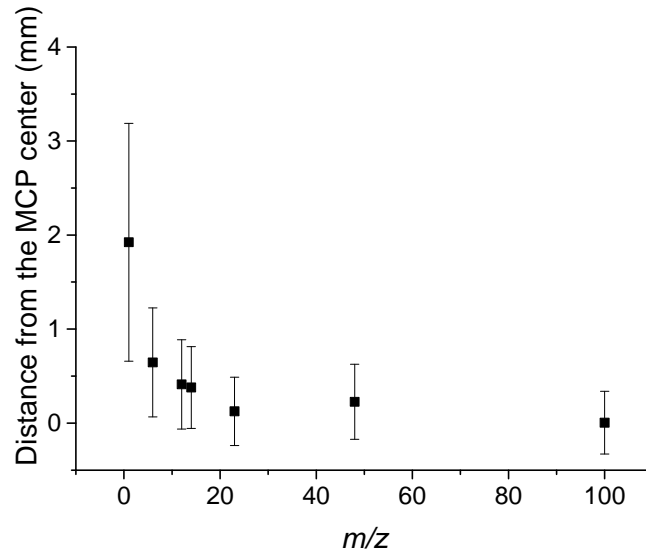

Figure S-5: Calculated dispersion of secondary ion arrival positions (energy 0.1 eV) on the surface of the MCP obtained by simulation for different mass-to-charge ratios:  $m/z$  1; 6; 12; 14; 23; 48 and 100 with an extraction delay equal to the pulse duration (100 ns).

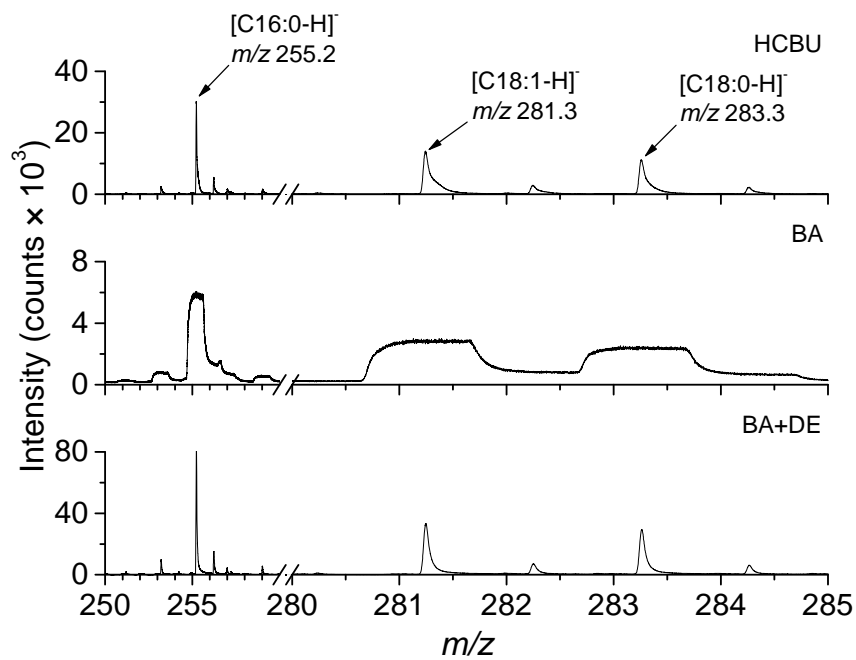

Figure S-6: Parts of TOF-SIMS negative ion mass spectra recorded on the surface of a rat brain section, using HCBU, BA, and BA+DE setting modes and showing three deprotonated fatty acids: C16:0; C18:1 and C18:0.

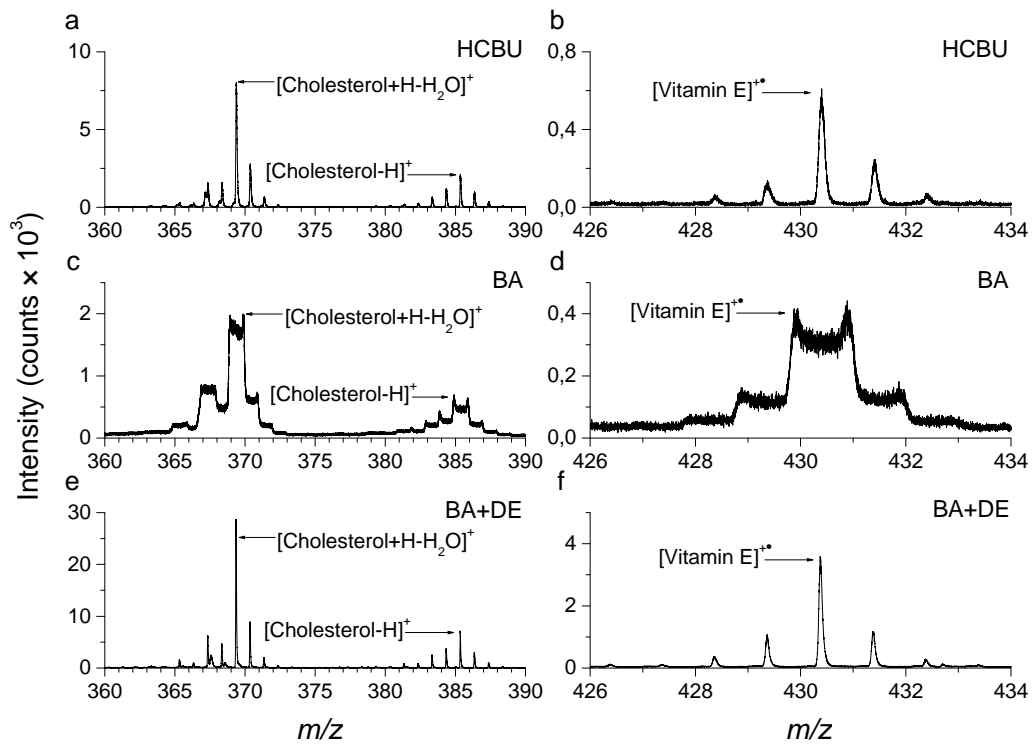

Figure S-7: Parts of TOF-SIMS positive ion mass spectra recorded on the surface of a rat brain section, using HCBU, BA, and BA+DE setting modes and showing two ion species of cholesterol (a,c,e) and the vitamin E isotopic distribution (b,d,f).
